# Supplementary material for: Editorial: Organic carbon pools in permafrost regions on the Qinghai–Xizang (Tibetan) Plateau
Source: Copernicus journal article supplement (doi:10.5194/tc-9-479-2015), 2015-03-06
Supplement: Supplementary file 1 [file Supplement.xls]

## Sheet: Sheet1
Site	Longitude	Latitude	Elevation (m)	Vegetation type	Geological stratigraphy	Active layer depth (m)	Sampling depth (m)	Soil depth (m)	SOC%	Bulk density (g cm-3)	Water content%	Soil texture
KXL	92.3765°	34.1202°	4762	Alpine steppe	Permian	1.8	18	1	1.91	0.37	11.3793	loam
								2	1.84	0.34	13.2275	loam
								3	1.21	0.41	12.654	loam
								4	1.31	0.86	15.634	loam
								5	1.46	0.97	14.687	loam
								6	1.55	0.96	13.984	loam
								7	1.4	1.08	14.0394	loam
								8	1.48	1.16	14.526	loam
								9	1.14	1.23	14.8515	loam
								10	1.07	0.91	14.7692	clay
								12	1.19	0.97	12.2324	clay
								13	0.95	1.17	11.2245	clay
								14	0.87	1.05	11.6216	clay
								15	0.76	0.94	10.654	clay
								16	1.01	0.65	10.321	clay
								17	0.98	0.87	9.561	clay
								18	0.63	0.69	9.321	clay
Site	Longitude	Latitude	Elevation (m)	Vegetation type	Geological stratigraphy	Active layer depth (m)	Sampling depth (m)	Soil depth (m)	SOC%	Bulk density (g cm-3)	Water content%	Soil texture
ZEH	92.5802°	35.4944°	4735	Alpine desert	Quaternary	4.9	25	0.3	0.84	1.11	17.3759	loam
								0.5	0.56	1.16	16.874	loam
								1	0.45	0.98	13.0952	loam
								1.5	0.36	0.67	18.864	loam
								2	0.42	0.48	52.1408	loam
								2.5	0.12	0.46	57.5305	clay
								3	0.04	0.94	40.8644	clay
								3.5	0.01	0.98	17.3017	clay
								4	0.01	0.87	29.4231	clay
								4.5	0.03	1.17	23.657	clay
								5	0.02	1.11	18.8046	loam
								5.5	0.04	1.14	17.2635	clay
								6	0.02	0.98	14.9225	clay
								6.5	0.06	1.09	14.698	loam
								7	0.03	1.17	12.9202	loam
								7.5	0.01	1.2	20.1731	loam
								8	0.01	1.21	20.1931	loam
								8.5	0.02	1.16	16.984	loam
								9	0.06	1.29	14.8168	clay
								9.5	0.02	1.21	16.542	loam
								10	0.02	1.24	21.1564	clay
								11	0.03	1.19	13.3024	loam
								12	0.08	1.14	8.81356	loam
								13	0.05	1.23	9.21117	loam
								14	0.13	1.26	11.8268	loam
								15	0.04	0.39	63.241	clay
								16	0.06	1.21	14.8591	loam
								17	0.11	1.06	12.4928	loam
								18	0.09	1.13	11.65	loam
								19	0.08	1.24	10.98	loam
								20	0.07	1.17	10.54	loam
								21	0.09	0.97	12.32	loam
								22	0.06	0.93	11.95	loam
								23	0.04	1.09	12.03	loam
								24	0.03	1.17	12.3	loam
								25	0.05	1.2	13.4928	loam
Site	Longitude	Latitude	Elevation (m)	Vegetation type	Geological stratigraphy	Active layer depth (m)	Sampling depth (m)	Soil depth (m)	SOC%	Bulk density (g cm-3)	Water content%	Soil texture
KL300	94.0650°	35.6390°	4779	Alpine meadow	Triassic	3.6	25	0.5	1.32	1.08	25.6	clay
								1	1.19	1.31	24.65	clay
								1.5	1.31	1.31	22.16	clay
								2	1.08	1.39	21.46	clay
								2.5	1.19	1.09	16.89	clay
								3.6	0.6	1.2	29.6	sand
								4.74	0.48	1.1	33.62	sand
								4.8	0.79	0.98	35.73	sand
								4.84	0.65	0.82	39.4	sand
								5.69	0.66	1.17	31.412	sand
								7.8	0.7	0.95	33.5	sand
								9.25	0.73	1.18	28.6541	sand
								9.7	1.63	0.72	40.65	loam
								10.45	2.52	0.64	42.13	loam
								11.1	2.58	0.84	35.62	loam
								11.6	2.98	0.96	30.987	silt
								12	2.56	0.78	34.621	silt
								12.3	2.41	0.87	30.951	silt
								12.45	3.11	0.86	34.621	silt
								12.98	2.14	1.04	29.654	silt
								13.91	1.96	0.93	32.164	silt
								14.55	2.03	1.37	15.6	silt
								15.1	1.31	1.06	33.654	silt
								15.18	1.53	0.81	36.214	silt
								16.3	1.28	1.29	16.354	silt
								16.8	2.17	1.37	16.3245	clay
								17.8	1.93	1.03	34.123	silt
								18.7	2.64	1.11	31.654	silt
								19.06	2.98	0.86	35.621	silt
								20.37	2.59	1.23	16.521	silt
								22.7	2.01	1.06	30.214	silt
								23.07	1.32	1.08	30.685	silt
								24.05	1.56	1.04	27.654	silt
								25	1.84	0.98	26.598	silt
Site	Longitude	Latitude	Elevation (m)	Vegetation type	Geological stratigraphy	Active layer depth (m)	Sampling depth (m)	Soil depth (m)	SOC%	Bulk density (g cm-3)	Water content%	Soil texture
HLH-1	93.1473°	35.1444°	4629	Alpine steppe	Triassic	3.2	18	1	0.93	0.57	6.86499	sand
								2	0.82	0.49	11.6022	sand
								3	1.37	0.39	10.8303	clay
								4	1.34	1.02	17.7778	clay
								6	0.82	1.38	15.4362	clay
								7	1.06	1.09	13.0612	clay
								8	1.02	1.34	15.63	clay
								9	0.96	1.24	14.35	clay
								10	0.84	0.96	12.34	clay
								11	0.94	1.16	11.65	clay
								12	0.91	1.24	10.69	clay
								13	0.86	1.39	12.63	clay
								14	0.81	1.34	9.86	clay
								15	0.76	1.18	11.98	clay
								16	0.54	0.97	12.32	clay
								17	0.63	1.13	13.62	clay
								18	0.71	1.01	9.96	clay
Site	Longitude	Latitude	Elevation (m)	Vegetation type	Geological stratigraphy	Active layer depth (m)	Sampling depth (m)	Soil depth (m)	SOC%	Bulk density (g cm-3)	Water content%	Soil texture
WDL	93.5877°	35.2775°	4605	Alpine meadow	Quaternary	2.2	18	2	0.88	1.24	12.4654	sand
								3	1.34	1.31	10.1064	loam
								4	1.28	1.17	9.90338	loam
								5	1.18	1.23	10.1911	loam
								6	0.98	1.35	10.7143	loam
								7	1.47	1.2	14.5251	clay
								8	1.38	0.76	17.7719	clay
								9	1.07	0.84	24.5	clay
								10	1.16	0.82	29.0735	clay
								11	1.39	1.24	21.5311	clay
								12	1.28	0.98	20.16	clay
								13	1.13	0.96	19.86	clay
								14	1.04	1.06	17.62	clay
								15	0.69	0.94	12.34	clay
								16	0.86	0.67	11.65	clay
								17	0.687	0.86	10.98	clay
								18	0.75	0.94	9.86	clay
Site	Longitude	Latitude	Elevation (m)	Vegetation type	Geological stratigraphy	Active layer depth (m)	Sampling depth (m)	Soil depth (m)	SOC%	Bulk density (g cm-3)	Water content%	Soil texture
HLH-2	93.1432°	35.1337°	4576	Alpine steppe	Triassic	1.8	18	1	1.43	0.49	13.141	loam
								2	1.26	0.38	11.6034	loam
								3	1.12	0.53	14.6172	loam
								4	1.12	0.34	33.6806	loam
								5	0.82	0.21	41.0765	clay
								6	0.87	0.22	41.0256	clay
								7	1.5	0.62	25.3482	clay
								8	1.22	0.98	19.398	sand
								9	1.02	1.38	11.1324	sand
								10	1.12	1.35	7.02179	sand
								12	1.17	0.97	9.61887	sand
								13	1.04	1.32	16.5888	clay
								14	0.9	1.01	17.4334	clay
								15	0.92	0.97	13.9151	loam
								16	0.95	1.23	20.1102	sand
								17	0.85	0.91	18.97	sand
								18	0.83	0.96	17.98	sand
Site	Longitude	Latitude	Elevation (m)	Vegetation type	Geological stratigraphy	Active layer depth (m)	Sampling depth (m)	Soil depth (m)	SOC%	Bulk density (g cm-3)	Water content%	Soil texture
XSH	93.8383°	35.6418°	4573	Alpine meadow	Quaternary	2.5	18	1	1.12	1.54	16.52	clay
								2	1.23	1.48	15.63	clay
								3.5	1.06	1.04	13.64	clay
								4	0.42	1.51	7.24832	clay
								6	0.55	1.52	10.9375	clay
								7.5	0.98	0.95	19.65	clay
								8	1.03	0.97	12.64	clay
								10.5	2.4	1.03	18.8324	clay
								11	2.02	1.07	20.0342	clay
								12	1.33	1.09	17.4138	clay
								14	1.44	1.13	16.8421	clay
								15	2.57	1.01	14.9047	clay
								16	0.72	1.12	17.1691	clay
								17	0.08	0.97	17.95	clay
								18	0.07	0.94	18.95	clay
Site	Longitude	Latitude	Elevation (m)	Vegetation type	Geological stratigraphy	Active layer depth (m)	Sampling depth (m)	Soil depth (m)	SOC%	Bulk density (g cm-3)	Water content%	Soil texture
KL450	94.0535°	35.6589°	4710	Alpine meadow	Triassic	3.4	25	0.3	1.59	1.53	13.68	silt
								0.6	0.77	1.61	15.8172	silt
								1.1	1.06	1.66	17.6389	silt
								1.3	0.98	1.65	21.35	silt
								1.6	0.45	1.21	25.801	silt
								2.1	0.84	1.38	17.6647	silt
								2.6	0.68	1.4	42.011	silt
								3.1	0.75	1.08	26.5005	silt
								3.6	0.94	1.57	34.8485	loam
								4.1	0.64	0.98	19.1027	loam
								4.5	0.88	1	20.8511	loam
								5	0.73	0.78	19.0065	loam
								5.5	0.79	0.99	22.7328	loam
								6	0.77	1.11	20.875	loam
								6.5	0.79	0.99	19.5946	loam
								7	0.94	0.62	15.6134	loam
								7.5	1.4	0.87	20.1377	loam
								8	0.98	0.76	22.3469	loam
								8.5	1.55	0.91	42.2118	loam
								9	0.55	0.48	29.0254	loam
								9.5	1.11	0.82	23.8602	loam
								10	0.71	1.05	16.2658	loam
								10.5	0.95	0.89	17.8464	loam
								11	0.97	1.09	15.1215	loam
								11.5	1.04	0.99	13.0319	clay
								12	1.02	0.68	14.4214	loam
								12.5	1.04	0.82	14.6712	loam
								12.9	0.61	0.89	30.2326	loam
								13.5	1.37	0.72	17.1429	loam
								14.2	0.53	0.97	13.6732	sand
								14.5	1.6	0.94	8.88208	loam
								15.1	0.38	0.89	6.28571	loam
								15.5	1.56	0.98	17.7243	loam
								16	1.36	1.01	13.7714	clay
								16.4	1.35	0.94	14.0121	clay
								17	1.36	0.89	13.5729	clay
								18	0.48	1.04	11.699	sand
								19	1.23	0.63	14.9206	clay
								20	1.44	0.49	19.9732	sand
								21	0.74	0.97	15.5224	sand
								22	1.22	0.6	14.2173	sand
								23	1.57	0.18	14.88	clay
								24	1.34	0.91	15.193	clay
								25	0.75	0.79	12.5	loam
Site	Longitude	Latitude	Elevation (m)	Vegetation type	Geological stratigraphy	Active layer depth (m)	Sampling depth (m)	Soil depth (m)	SOC%	Bulk density (g cm-3)	Water content%	Soil texture
KL150	94.0550°	35.6580°	4709	Alpine meadow	Triassic	2.8	25	1.1	1.69	1.41	13.54	silt
								2.16	0.97	1.19	14.69	silt
								2.76	1.26	1.23	17.6389	silt
								3.5	1.13	1.04	21.35	silt
								3.6	0.65	0.63	24.65	silt
								3.7	1.24	0.68	17.6647	silt
								5.43	1.57	0.83	39.65	silt
								7.62	1.29	0.3	28.65	silt
								8.09	0.94	0.92	32.12	loam
								10.35	0.64	1.04	20.65	loam
								11.58	0.88	0.9	20.8511	loam
								13.22	0.73	1.02	19.86	loam
								15.17	0.84	1.15	22.7328	loam
								16.69	1.88	1.1	20.875	loam
								18.5	1.05	0.89	19.5946	loam
								19.55	1.42	0.52	15.6134	loam
								20.5	1.51	1.14	20.1377	loam
								21.6	0.73	0.66	22.3469	loam
								21.9	0.51	0.81	42.2118	loam
								22.25	1.37	0.38	29.0254	loam
								23.6	0.68	0.72	22.38	loam
								24.1	1.33	0.82	15.64	loam
								24.4	1.01	1.01	13.5297	loam
								25	0.83	1.04	12.65	loam
Site	Longitude	Latitude	Elevation (m)	Vegetation type	Geological stratigraphy	Active layer depth (m)	Sampling depth (m)	Soil depth (m)	SOC%	Bulk density (g cm-3)	Water content%	Soil texture
Heihe-2	100.9069°	38.0033°	3615	Alpine meadow	Quaternary	1.3	15	0.0926	13.42	0.53	59.1596	clay
								0.1562	13.98	0.41	65.9162	clay
								0.2198	14.55	0.47	63.5913	clay
								0.3034	6.17	0.41	67.0107	clay
								0.365	4.59	0.39	66.4045	clay
								0.4246	3.01	0.39	68.9087	clay
								0.4772	3.17	0.45	63.8755	clay
								0.5368	3.33	0.4	65.2915	clay
								0.6054	3.35	0.46	59.8245	clay
								0.7164	3.94	0.56	52.9549	clay
								0.8184	4.53	1.19	28.6013	clay
								0.8934	4.86	1.3	26.0904	clay
								0.9904	4.61	1.25	28.1893	clay
								1.0774	4.64	1.47	23.3036	clay
								1.1654	4.67	1.42	21.9042	clay
								1.2674	5.37	1.32	24.4078	clay
								1.3874	5.33	0.6	53.5785	clay
								1.5004	6.9	0.36	69.8226	clay
								1.5824	6.43	0.23	79.7957	clay
								1.7094	5.95	0.33	72.4323	clay
								1.8024	5.09	0.39	69.5124	clay
								1.9284	5.55	0.34	71.1386	clay
								2.0724	5.29	0.38	67.145	clay
								2.1944	5.33	0.32	73.258	clay
								2.3044	4.44	0.28	73.9876	clay
								2.477	5.33	0.38	69.925	clay
								2.6	6.72	0.31	73.6854	clay
								2.7096	7.65	0.25	77.3668	clay
								2.7862	8.11	0.31	73.4729	clay
								2.8658	8.57	0.29	73.4478	clay
								2.9484	5.74	0.23	78.5627	clay
								3	4.73	0.28	75.1149	clay
								3.0769	2.91	0.57	58.4995	clay
								3.1411	3.71	0.7	51.9471	clay
								3.2253	1.96	0.71	49.2013	loam
								3.3289	3.49	0.53	63.9457	loam
								3.4045	4.59	0.45	66.5124	loam
								3.4601	1.35	0.51	62.4902	loam
								3.5377	1.16	0.95	43.8338	loam
								3.6383	1.36	1	38.5827	loam
								3.7159	1.11	0.62	56.8958	loam
								3.7785	0.94	1.68	20.4759	loam
								3.9127	0.77	0.96	40.9179	loam
								3.9743	1.26	0.48	60.5683	loam
								4.1205	1.02	0.62	53.9058	loam
								4.2389	1.14	1.19	33.2142	loam
								4.4121	1.08	1.31	23.5339	loam
								4.5147	1.11	1.1	36.095	loam
								4.6529	1.09	1.26	33.013	loam
								6	1.06	1.31	29.06	loam
								6.5	1.05	1.29	28	loam
								7	1.03	1.28	27.46	loam
								7.5	1.01	1.3	24.35	loam
								8	0.96	1.31	21.65	sand
								8.5	0.98	1.32	19	sand
								10	0.94	1.34	17.64	sand
								11	0.91	1.29	18.16	sand
								12	0.89	1.28	16.85	sand
								13.5	0.87	1.27	15.46	sand
								14.5	0.79	1.26	13.56	sand
								15	0.78	1.25	12.35	sand
Site	Longitude	Latitude	Elevation (m)	Vegetation type	Geological stratigraphy	Active layer depth (m)	Sampling depth (m)	Soil depth (m)	SOC%	Bulk density (g cm-3)	Water content%	Soil texture
Heihe-1	100.9163°	37.9979°	3700	Alpine meadow	Quaternary	1.4	19	0.037	12.81	0.32	72.0592	clay
								0.113	11.6	0.34	70.1541	clay
								0.1905	12.18	0.35	70.1496	clay
								0.3045	11.37	0.31	71.5542	clay
								0.3885	11.52	0.25	71.9872	clay
								0.4755	6.43	0.54	57.1021	clay
								0.5765	6.99	0.61	55.6592	clay
								0.655	6.01	0.64	53.1419	clay
								0.743	5.52	0.67	51.5301	clay
								0.822	7.09	0.62	53.7867	clay
								0.91	5.63	0.88	43.744	clay
								0.987	5.77	0.88	42.1925	clay
								1.092	4.57	1.11	31.6109	clay
								1.175	8.72	0.39	67.2145	clay
								1.278	4.25	0.63	55.8312	clay
								1.46	3.62	0.16	87.8558	clay
								1.547	3.68	0.24	80.2318	clay
								1.628	4.13	0.2	81.6499	clay
								1.725	4.67	0.2	79.9548	clay
								1.815	6.41	0.29	73.5977	clay
								1.925	4.47	0.26	76.1935	clay
								2.028	5.79	0.22	80.0546	clay
								2.111	9.77	0.21	80.1562	clay
								2.242	4.72	0.23	78.2989	clay
								2.388	11.73	0.23	79.9423	clay
								2.491	9.85	0.17	84.0782	clay
								2.595	13.38	0.2	82.5654	clay
								2.686	6.17	0.28	72.8391	clay
								2.793	11.34	0.3	75.6909	clay
								2.888	7.42	0.39	67.836	clay
								2.995	10.08	0.39	66.4476	clay
								3.1	4.65	0.64	57.3767	clay
								3.191	6.89	0.41	67.4445	clay
								3.296	6.2	0.28	75.8246	clay
								3.386	3.88	0.37	70.5465	clay
								3.477	5	0.22	80.8692	clay
								3.594	10.57	0.19	83.1843	clay
								3.686	11.55	0.27	76.9631	clay
								3.778	11.4	0.25	77.1493	clay
								3.884	11.14	0.27	76.7275	clay
								3.954	11.12	0.3	74.4927	clay
								4.028	10.11	0.26	76.5746	clay
								4.138	10.15	0.38	68.3883	clay
								4.224	8.04	0.22	80.2438	clay
								4.306	5.99	0.35	71.6116	clay
								4.383	5.61	0.24	78.5912	clay
								4.475	5.09	0.2	95.3382	clay
								4.561	5.91	0.19	82.443	clay
								4.664	2.84	0.3	76.0989	clay
								4.7553	2.94	0.4	67.7564	clay
								4.8399	3.51	0.4	69.1877	clay
								4.9365	3.05	0.3	74.7684	clay
								5.0361	3.22	0.43	65.2345	loam
								5.1467	3.3	0.24	79.5353	loam
								5.2403	3.86	0.19	82.2567	loam
								5.3229	4	0.33	71.9137	loam
								5.4145	4.59	0.25	76.3835	loam
								5.5251	3.28	0.26	78.4422	loam
								5.6047	2.51	0.43	64.7723	loam
								5.6863	3.02	0.43	65.4353	loam
								5.7989	2.93	0.64	55.9012	loam
								5.8825	3.89	0.4	68.3638	loam
								6	2.51	0.57	58.5525	loam
								6.5	1.56	0.51	43.65	loam
								7	1.32	0.95	35.65	loam
								7.5	1.21	0.85	38.5	loam
								8	1.16	0.62	37.64	loam
								8.5	1.08	1.68	32.89	sand
								10	1.03	0.96	29.87	sand
								11	1.01	0.48	26.85	sand
								12	0.98	0.76	25.36	sand
								13.5	0.97	0.89	23.14	sand
								14.5	0.95	0.85	22.78	sand
								15	0.94	0.93	19.65	sand
								16.5	0.89	0.95	18.54	sand
								18	0.85	1.11	17.65	sand
								19	0.81	1.14	16.85	sand
