# Supplementary material for: Editorial: Organic carbon pools in permafrost regions on the Qinghai–Xizang (Tibetan) Plateau
Source: Copernicus journal article supplement (doi:10.5194/tc-9-479-2015), 2015-03-06
Supplement: Supplementary file 1 [file tc-9-479-2015-supplement-cover-letter.pdf › tc-9-479-2015-supplement-cover-letter.pdf]

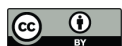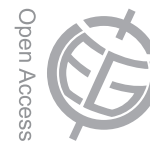

## *Supplement of*

# **Editorial: Organic carbon pools in permafrost regions on the Qinghai–Xizang (Tibetan) Plateau**

C. Mu et al.

*Correspondence to:* T. Zhang (tjzhang@lzu.edu.cn)

- [tc-9-479-2015-supplement-cover-letter.pdf](#)
- [Supplement.xls](#)
